# Supplementary material for: Lipidomic Profiling Reveals Significant Perturbations of Intracellular Lipid Homeostasis in Enterovirus-Infected Cells
Source: PubMed Central journal article supplement (PMC6928875; doi:10.3390/ijms20235952), 2019-11-26
Supplement: ijms-20-05952-s001.pdf [file ijms-20-05952-s001.pdf]

Article

# Lipidomic Profiling Reveals Significant Perturbations of Intracellular Lipid Homeostasis in Enterovirus-Infected Cells

Bingpeng Yan <sup>1,2,†</sup>, Zijiao Zou <sup>2,†</sup>, Hin Chu <sup>1,2,†</sup>, Gabriella Chan <sup>2</sup>, Jessica Oi-Ling Tsang <sup>2</sup>, Pok-Man Lai <sup>2</sup>, Shuofeng Yuan <sup>1,2</sup>, Cyril Chik-Yan Yip <sup>2</sup>, Feifei Yin <sup>3,4,5</sup>, Richard Yi-Tsun Kao <sup>1,2</sup>, Kong-Hung Sze <sup>1,2</sup>, Susanna Kar-Pui Lau <sup>1,2,7</sup>, Jasper Fuk-Woo Chan <sup>1,2,3,7,\*</sup> and Kwok-Yung Yuen <sup>1,2,3,7,8,\*</sup>

<sup>1</sup> State Key Laboratory of Emerging Infectious Diseases, The University of Hong Kong, Pokfulam, Hong Kong Special Administrative Region; ybp1205@hku.hk (B.Y.); hinchu@hku.hk (H.C.); yuansf@hku.hk (S.Y.); rytkao@hku.hk (R.Y.-T.K.); khsze@hku.hk (K.-H.S.); skplau@hku.hk (S.K.-P.L.); jfwchan@hku.hk (J.F.-W.C.); kyyuen@hku.hk (K.-Y.Y.)

<sup>2</sup> Department of Microbiology, Li Ka Shing Faculty of Medicine, The University of Hong Kong, Pokfulam, Hong Kong Special Administrative Region; u3006001@hku.hk (Z.Z.); gchan2@hku.hk (G.C.); joltsang@connect.hku.hk (J.O.-L.T.); vangor@hku.hk (P.-M.L.); yipcyril@hku.hk (C.C.-Y.Y.)

<sup>3</sup> Hainan Medical University-The University of Hong Kong Joint Laboratory of Tropical Infectious Diseases, Hainan Medical University, Haikou, Hainan, and The University of Hong Kong, Pokfulam, Hong Kong Special Administrative Region; yinfeifeiff@163.com (F.Y.)

<sup>4</sup> Department of Pathogen Biology, Hainan Medical University, Haikou, Hainan, 571101, China;

<sup>5</sup> Key Laboratory of Translational Tropical Medicine, Hainan Medical University, Haikou, Hainan, 571101, China

<sup>7</sup> Carol Yu Centre for Infection, The University of Hong Kong, Pokfulam, Hong Kong Special Administrative Region

<sup>8</sup> The Collaborative Innovation Center for Diagnosis and Treatment of Infectious Diseases, The University of Hong Kong, Pokfulam, Hong Kong Special Administrative Region

\* Correspondence: jfwchan@hku.hk (J.F.-W.C.); kyyuen@hku.hk (K.-Y.Y.)

Tel.: +852-2255-2413 (J.F.-W.C. and K.-Y.Y.)

Fax: +852-2255-1241 (J.F.-W.C. and K.-Y.Y.)

† These authors contributed equally to this work as co-first authors.

Table S1. List of the mixture of 15 internal standards with corresponding statistical information

| Common Name                         | Formula      | Detection mode | Adduct ion name | m/z      | RT (min) | Rt-drift | ppm tolerance | CV of cell samples | CV of QC samples |
|-------------------------------------|--------------|----------------|-----------------|----------|----------|----------|---------------|--------------------|------------------|
| CE (22:1) [M+Na]+ iSTD              | C49H86O2     | Positive       | [M+Na]+         | 729.6534 | 16.83    | 0.42%    | -1.9187       | 14.92%             | 12.34%           |
| CE (22:1) [M+NH4]+ iSTD             | C49H86O2     | Positive       | [M+NH4]+        | 724.6975 | 16.83    | 0.30%    | -1.2419       | 15.65%             | 14.73%           |
| Ceramide C17 [M+H]+ iSTD            | C35H69NO3    | Positive       | [M+H]+          | 552.5359 | 9.88     | 2.83%    | -1.6289       | 14.67%             | 11.04%           |
| Ceramide C17 [M+H-H2O]+ iSTD        | C35H69NO3    | Positive       | [M+H-H2O]+      | 534.525  | 9.88     | 2.63%    | -0.9354       | 9.80%              | 10.71%           |
| Ceramide C17 [M+Na]+ iSTD           | C35H69NO3    | Positive       | [M+Na]+         | 574.5182 | 9.88     | 2.63%    | -2.0887       | 12.74%             | 11.96%           |
| Cholesterol d7 [M-H2O+H]+ iSTD      | C27H39D7O    | Positive       | [M-H2O+H]+      | 376.396  | 5.89     | 1.53%    | -1.3284       | 16.75%             | 13.88%           |
| PAF C-16 [M+H]+ d4 iSTD             | C26H50D4NO7P | Positive       | [M+H]+          | 528.3976 | 1.7      | 0.00%    | -2.6495       | 9.13%              | 11.93%           |
| DG (12:0/12:0/0:0) [M+Na]+ iSTD     | C27H52O5     | Positive       | [M+Na]+         | 479.3728 | 4.6      | 1.74%    | -4.3807       | 9.42%              | 10.83%           |
| DG (12:0/12:0/0:0) [M+NH4]+ iSTD    | C27H52O5     | Positive       | [M+NH4]+        | 474.4171 | 4.6      | 1.74%    | -3.7941       | 11.69%             | 14.27%           |
| DG (18:1/2:0/0:0) [M+Na]+ iSTD      | C23H42O5     | Positive       | [M+Na]+         | 421.293  | 2.58     | 1.55%    | -1.1868       | 9.94%              | 13.35%           |
| DG (18:1/2:0/0:0) [M+NH4]+ iSTD     | C23H42O5     | Positive       | [M+NH4]+        | 416.3379 | 2.58     | 1.55%    | -1.9215       | 16.67%             | 8.87%            |
| LPC (17:0) [M+H]+ iSTD              | C25H52NO7P   | Positive       | [M+H]+          | 510.3575 | 1.59     | 2.52%    | -4.1148       | 8.79%              | 11.89%           |
| LPE (17:1) [M+H]+ iSTD              | C22H44NO7P   | Positive       | [M+H]+          | 466.2947 | 1.29     | 1.55%    | -4.0747       | 9.15%              | 10.26%           |
| PC (12:0/13:0) [M+H]+ iSTD          | C33H66NO8P   | Positive       | [M+H]+          | 636.4587 | 3.31     | 1.81%    | 1.4141        | 9.81%              | 9.45%            |
| PE (17:0/17:0) [M+H]+ iSTD          | C39H78NO8P   | Positive       | [M+H]+          | 720.5572 | 11.57    | 2.42%    | -4.7186       | 9.51%              | 9.12%            |
| SM (17:0) [M+H]+ iSTD               | C40H81N2O6P  | Positive       | [M+H]+          | 717.5917 | 7.3      | 2.33%    | -0.2787       | 8.95%              | 10.57%           |
| Sphingosine (d17:1) [M+H]+ iSTD     | C17H35NO2    | Positive       | [M+H]+          | 286.273  | 1.14     | 1.75%    | 3.8402        | 10.17%             | 10.67%           |
| TG (17:0/17:1/17:0) [M+Na]+ d5 iSTD | C54H97D5O6   | Positive       | [M+H]+          | 874.7945 | 16.12    | -0.12%   | -7.7733       | 12.78%             | 10.08%           |
| Arachidonic acid [M-H]- d8 iSTD     | C20H24D8O2   | Negative       | [M-H]-          | 311.2837 | 2.04     | 2.39%    | -1.6063       | 10.60%             | 3.09%            |
| LPC (17:0) [M+HAc-H]- iSTD          | C25H52NO7P   | Negative       | [M-H]-          | 568.3615 | 1.55     | 3.73%    | -1.0557       | 17.30%             | 6.28%            |
| LPE (17:1) [M-H]- iSTD              | C22H44NO7P   | Negative       | [M-H]-          | 464.2787 | 1.27     | 3.05%    | -3.6616       | 9.92%              | 6.39%            |
| PE (17:0/17:0) [M-H]- iSTD          | C39H78NO8P   | Negative       | [M-H]-          | 718.5399 | 11.08    | 4.73%    | -0.6959       | 5.90%              | 7.19%            |
| PG (17:0/17:0) [M-H]- iSTD          | C40H79O10P   | Negative       | [M-H]-          | 749.5316 | 7.93     | 1.25%    | 4.1359        | 18.82%             | 9.00%            |

Abbreviations: CE, Cholesterol ester; DG, diacylglycerol; LPC, lysophosphatidylcholine; LPE, lysophosphatidylethanolamine; PC, phosphatidylcholine; PE, phosphatidylethanolamine; PG, phosphatidylglycerol; SM, sphingomyelin; TG, triacylglycerol.

Table S2. Cross-validated parameters of the OPLS-DA model based on the EV-A71-, CV-A16- and mock-infected groups

| OPLS-DA model | Detection mode | Time point | R2X   | R2Y   | Q2    |
|---------------|----------------|------------|-------|-------|-------|
| EV71 vs Mock  | negative       | 4h         | 0.963 | 1     | 0.843 |
| EV71 vs Mock  | positive       | 4h         | 0.696 | 0.999 | 0.977 |
| CA16 vs Mock  | negative       | 4h         | 0.92  | 1     | 0.871 |
| CA16 vs Mock  | positive       | 4h         | 0.705 | 0.997 | 0.931 |

Table S3. Gradient elution program applied for UPLC-MS analysis

| Time(min) | Flow rate<br>(ml/min-1) | Mobile phase |      | Curve |
|-----------|-------------------------|--------------|------|-------|
|           |                         | A(%)         | B(%) |       |
| Initial   | 0.4                     | 60%          | 40%  | 6     |
| 2         | 0.4                     | 57%          | 43%  | 6     |
| 2.1       | 0.4                     | 50%          | 50%  | 6     |
| 12        | 0.4                     | 46%          | 54%  | 6     |
| 12.1      | 0.4                     | 30%          | 70%  | 6     |
| 18        | 0.4                     | 1%           | 99%  | 6     |
| 18.1      | 0.4                     | 60%          | 40%  | 6     |
| 20        | 0.4                     | 60%          | 40%  | 6     |

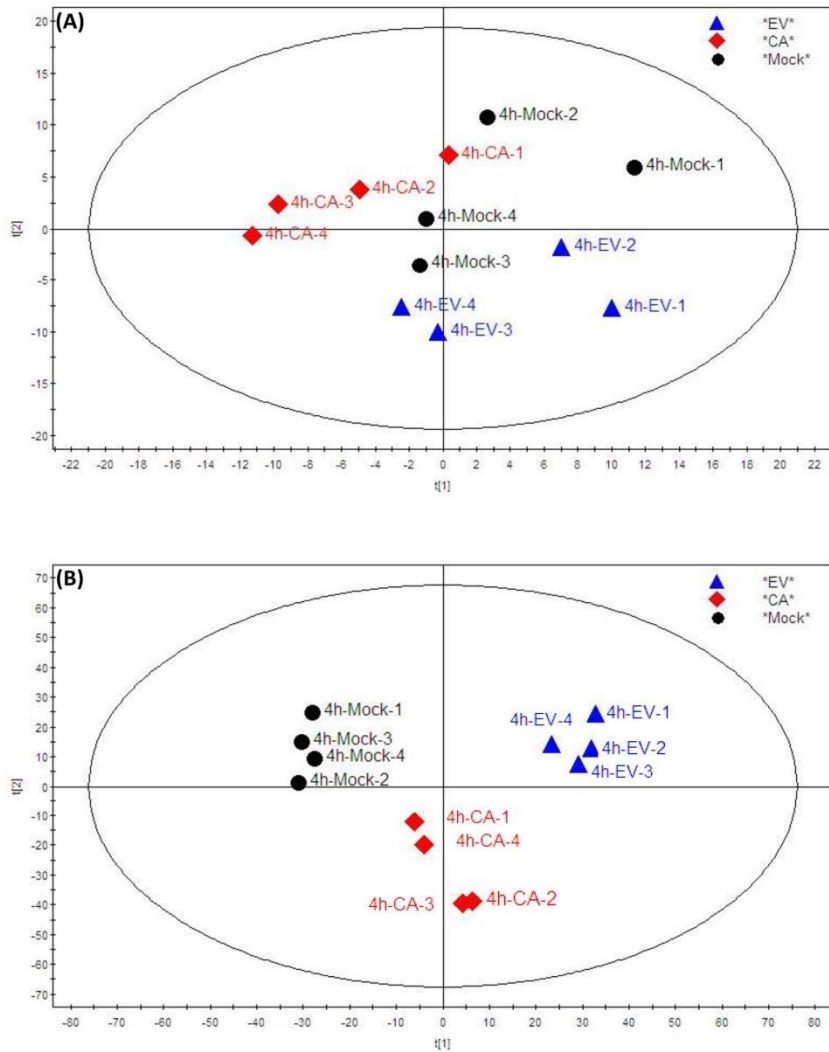

**Figure S1.** Principal component analysis (PCA) score plots in the (A) negative (A) and (B) positive modes (B) showing the distribution of lipids in based on RD cells samples infected with EV-A71, CV-A16, or mock infections (4 samples per group). Abbreviations: CA, CV-A16-infected cells; EV, EV-A71-infected cells; Mock, mock-infected cells; 4h, 4 hours post-infection.

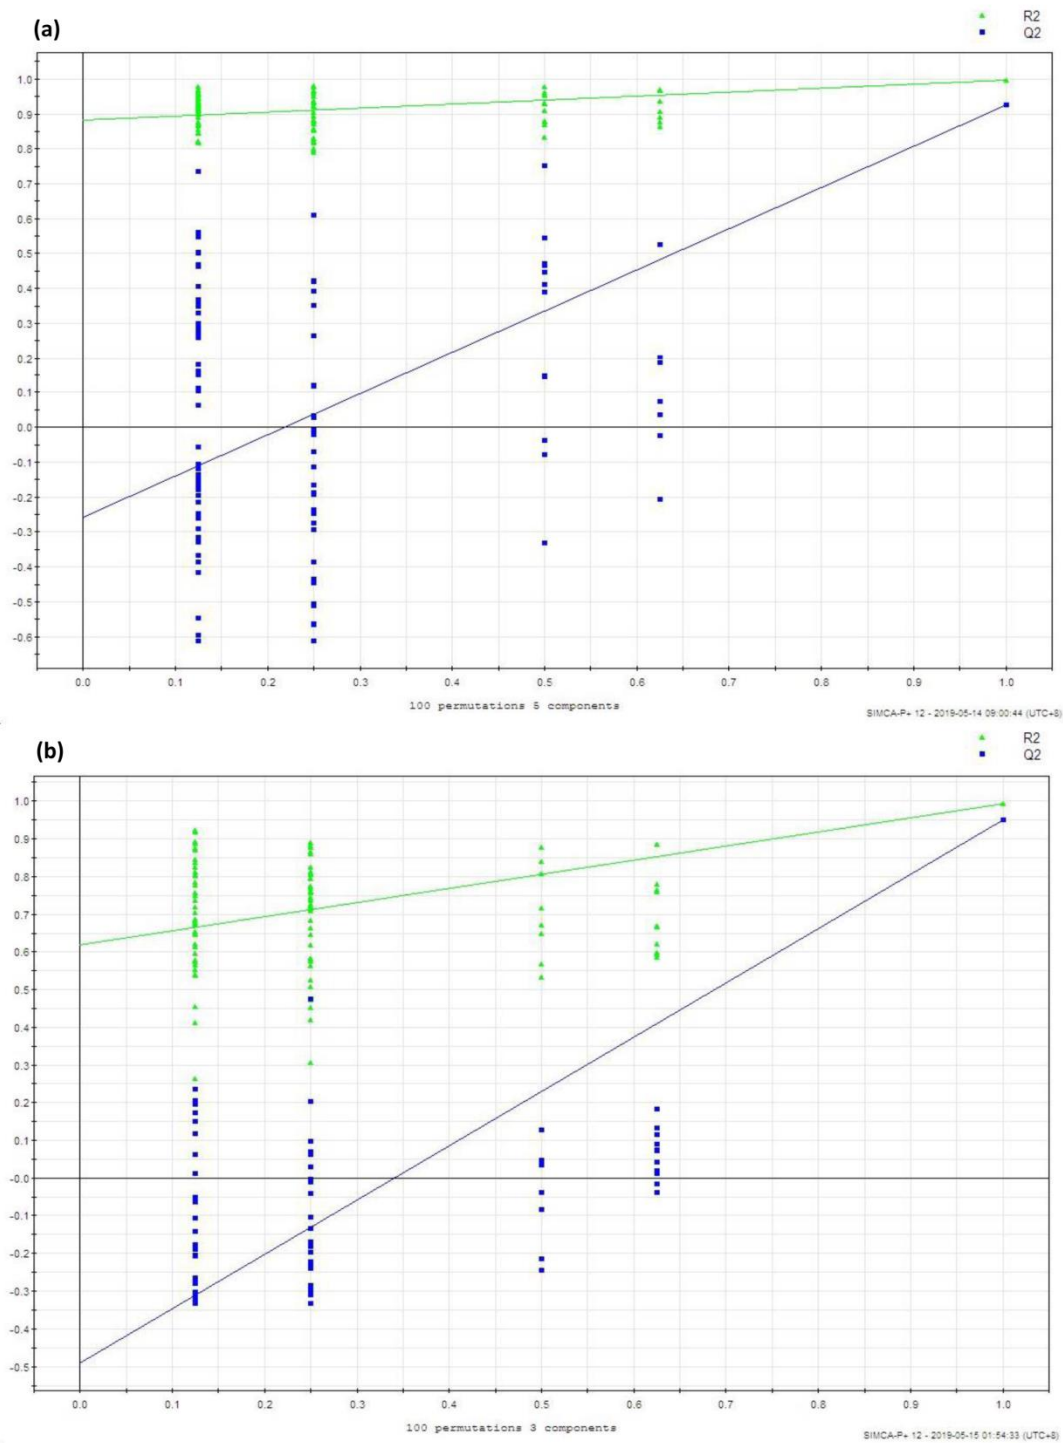

**Figure S2.** The permutation test (100 times) of PLS-DA model in different ionization modes. (a) Permutation test (4 hours data) in the negative mode and (b) permutation test (4 hours data) in the positive mode.

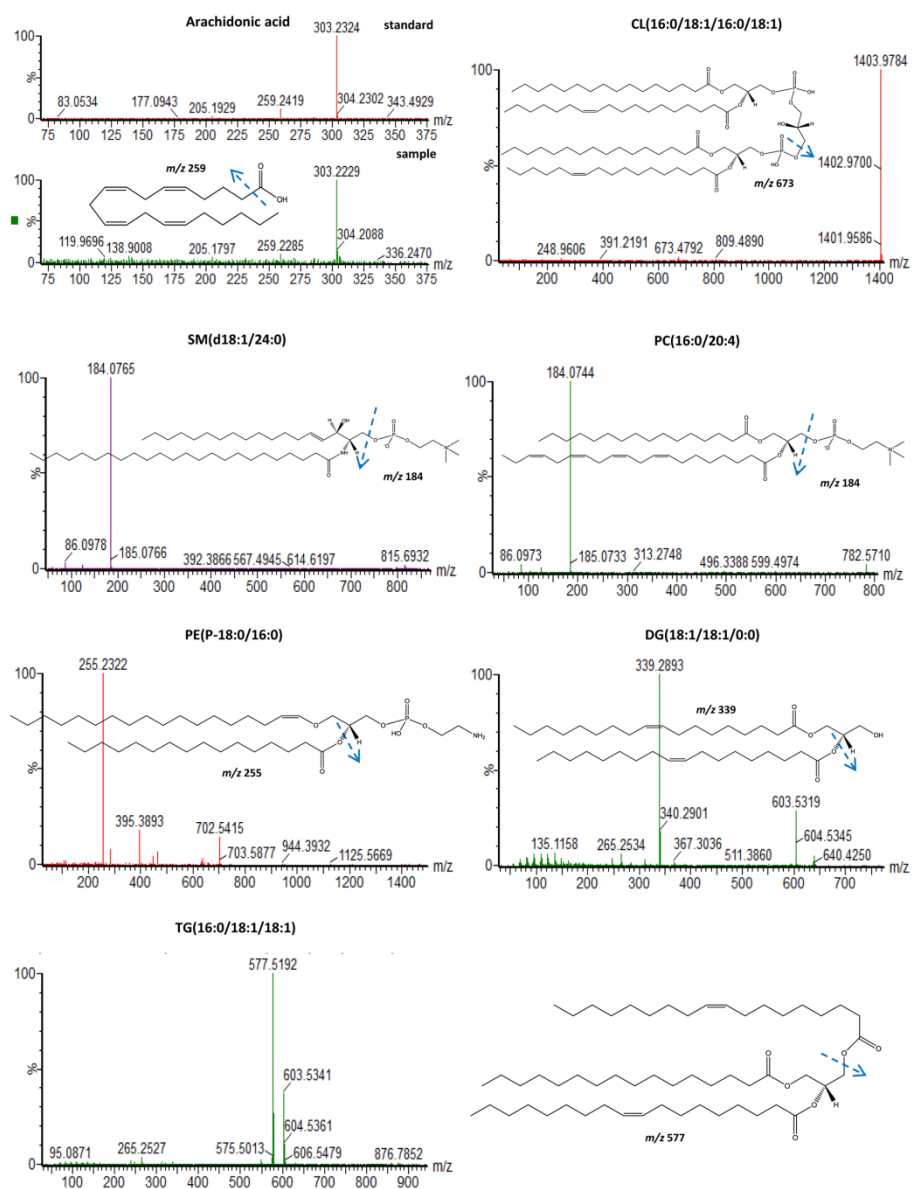

**Figure S3.** The MS/MS mass spectra and predicted structures with expected fragmentation profiles of the 7 representative lipids in the identified lipids table
